# Supplementary material for: Effect of Heavy Metals in Plants of the Genus Brassica
Source: Int J Mol Sci. 2015 Aug 4;16(8):17975–98. doi: 10.3390/ijms160817975 (PMC4581231; doi:10.3390/ijms160817975)
Supplement: Supplementary file 1 [file ijms-16-17975-s001.xlsx]

## Sheet: Table S1
Table S1 . Selected results on the uptake of heavy metals in different Brassica species, as a function of experimental conditions and metal toxicity.
Species	Variety/Cultivara	Metal	Age (d)b	Mediumc	DAT (d)d	Concentration	Uptake (mg/kg DW)e,f			Ref
							Roots	Stems	Leaves/shoots
B. juncea	-	Cd	25	S	90	200 mg/L	29.1	-	17.2	[8]
						300 mg/L	38.1	-	20.8
	-	Cd	29	H	10	3 mg/L	3290	-	269	[14]
						9 mg/L	8300	-	565
						30 mg/L	16700	-	364
			15	S	90	5 mg/kg	103	-	25
						35 mg/kg	255	-	183
	(several)	Cd	10		1	0.5 mM	-	-	1.6-3.97	[22]
				H	2	0.5 mM	-	-	2.0-4.97
					3	0.5 mM	-	-	2.8-6.07
					1	1.0 mM	-	-	2.0-5.0
				H	2	1.0 mM	-	-	2.9-5.8
					3	1.0 mM	-	-	2.9-6.6
					1	1.5 mM	-	-	2.9-6.7
				H	2	1.5 mM	-	-	2.9-6.6
					3	1.5 mM	-	-	3.3-7.1
					1	2.0 mM	-	-	2.9-6.2
				H	2	2.0 mM	-	-	4.1-6.7
					3	2.0 mM	-	-	4.0-7.1
	Varuna					25 mg/kg	115	-	16	[76]
		Cd	0.5	S	na	50 mg/kg	250	-	37
						100 mg/kg	300	-	62
	RH-30	Cd	0.5	S	na	25 mg/kg	125	-	33
						50 mg/kg	340	-	87
						100 mg/kg	585		90
	AC-Vulcan 95-ISOL	Cd	22	S	4	10 μM	1940	44	76	[96]
						25 μM	2790	117	172
						50 μM	2790	210	316
						100 μM	4580	345	468
						200 μM	15970	665	722
	ac. 426308	Cd	0	S	37	50 mg/kg	-	-	160	[35]
						100 mg/kg	-	-	190
						150 mg/kg	-	-	210
						200 mg/kg	-	-	225
		Cd	3	S	22	150 μM	-	-	92	[36]
					30		-	-	65
					38		-	-	76
					45		-	-	56
		Cd	14	H	15	10 μM	1305	-	174	[24]
						25 μM	3160	-	360
						50 μM	4435	-	890
						100 μM	4725	-	1495
	-	Cd	0	S	90	5 mg/kg	103	-	25	[88]
						15 mg/kg	127	-	63
						35 mg/kg	255	-	183
	-	Cd	10	H	14	10 μM	215	-	102	[69]
						20 μM	349	-	192
						40 μM	588	-	272
						80 μM	790	-	373
						160 μM	1179	-	649
					28	10 μM	306	-	153
						20 μM	492	-	214
						40 μM	937	-	485
						80 μM	1216	-	704
						160 μM	1925	-	978
	Rohini	Cd	7	H	28	15 μM	220	-	90	[25]
						30 μM	588	-	272
						60 μM	795	-	375
						120 μM	1180	-	590
					56	15 μM	310	-	140
						30 μM	940	-	452
						60 μM	1220	-	640
						120 μM	1980	-	1110
	PBR-91	Cr	0	H	7	25 mg/L	-	-	100	[83]
						50 mg/L	-	-	119
						100 mg/L	-	-	180
	Rohini	Cr	7	H	28	15 μM	150	-	50	[25]
						30 μM	195	-	66
						60 μM	292	-	102
						120 μM	387	-	145
					56	15 μM	270	-	95
						30 μM	890	-	320
						60 μM	1141	-	432
						120 μM	1540	-	618
	PBR-91	Co	0	H	7	25 mg/L	-	-	110	[83]
						50 mg/L	-	-	158
						100 mg/L	-	-	224
	RH-30	Cu	12	H	14	0.32 mg/L	856	-	31	[17]
	-	Cu	9	H		10 μM	475.3	-	45.4	[21]
					7	25 μM	1666	-	65.2
						50 μM	3531	-	162.2
						10 μM	686.1	-	49.8
					14	25 μM	1821	-	79.6
						50 μM	3667	-	88.3
	-	Cu	13	H	2	8 μM	610	-	-	[67]
					4		865	-	-
					6		810	-	-
					8		835	-	-
	PBR-91	Cu	0	H	7	25 mg/L	-	-	81	[83]
						50 mg/L	-	-	168
						100 mg/L	-	-	235
	Rohini	Cu	7	H	28	15 μM	235	-	45	[25]
						30 μM	620	-	120
						60 μM	840	-	210
						120 μM	1210	-	330
					56	15 μM	340	-	69
						30 μM	965	-	212
						60 μM	1245	-	311
						120 μM	1995	-	795
	-	Hg	25	H	7	5 μM	27000	-	320	[56]
						10 μM	49000	-	550
	PBR-91	Mn	0	H	7	25 mg/L	-	-	224	[83]
						50 mg/L	-	-	331
						100 mg/L	-	-	445
	PBR-91	Ni	0	H	7	25 mg/L	-	-	94	[83]
						50 mg/L	-	-	135
						100 mg/L	-	-	135
	India	Pb	21	H	21	200 μM	40000	-	110	[59]
						400 μM	81000	-	570
						800 μM	99000	-	2100
						1000 μM	112000	-	2300
	Rohini	Pb	7	H	28	15 μM	250	-	35	[25]
						30 μM	645	-	98
						60 μM	890	-	150
						120 μM	1280	-	240
					56	15 μM	370	-	55
						30 μM	991	-	170
						60 μM	1276	-	240
						120 μM	2040	-	409
	-	Zn	0	S	42	400 mg/kg	193	-	96	[46]
	RH-30	Zn	12	H	14	6.5 mg/L	6075	-	870	[17]
B. napus	AC-Excel 95	Cd	22	S	4	10 μM	1940	33	68	[96]
						25 μM	4030	55	123
						50 μM	4380	100	195
						100 μM	6670	295	275
						200 μM	19150	610	545
	Drakkar	Cd	14	H	15	10 μM	725	-	145	[24]
						25 μM	1880	-	175
						50 μM	3335	-	350
						100 μM	4630	-	565
			2	S	47	10 μM	-	20	45	[80]
						15 μM	-	65	170
						25 μM	-	80	220
						45 μM	-	100	200
						100 μM	-	150	260
						200 μM	-	180	280
	Jumbo, Drakkar, Cossair, Pactol	Cd	45	H	3	250 μM	31.3-44.5	17.8-64.8	5.5-8.3	[65]
	Faisal canola	Cd	42	H	56	10 μM	1320.7	1108.3	600.3	[34]
						50 μM	2758.6	1908.7	1108.3
	Texuan 4	Cd	21	H	7	20 μM	2400	-	260	[103]
						40 μM	5110	-	450
						80 μM	7950	-	730
						120 μM	13800	-	870
	ZS 758	Cr	14	S	15	100 μM	1157.7	-	31.4	[23]
						400 μM	4404.7	-	88.4
	Zheda 619	Cr	14	S	15	100 μM	1422		38.7
						400 μM	4726.7	-	106
	ZY 50	Cr	14	S	15	100 μM	1471		41.4
						400 μM	4846.7	-	107.7
	Zheda 622	Cr	14	S	15	100 μM	1566.8		49.6
						400 μM	5417.7	-	141.8
	Parkland	Cu	12	H	14	0.32 mg/L	1240	-	26	[17]
	-	Cu	9	H		10 μM	713.2	-	40.5	[21]
					7	25 μM	1849	-	66.6
						50 μM	3260	-	85.3
						10 μM	740.4	-	57.7
					14	25 μM	1994	-	74.7
						50 μM	2478	-	82
	Faisal canola	Pb	42	H	42	50 μM	2233.4	217.6	164.1	[33]
						100 μM	4160.7	408	311.4
	Jumbo, Drakkar, Cossair, Pactol	Zn	45	H	3	2000 μM	69.3-117.5	30.2-142.9	22.3-59.5	[65]
	Parkland	Zn	12	H	14	6.5 mg/L	10320	-	2105	[17]
B. carinata	-	Cd	0	H	28	20 μM	-	-	60	[37]
		Cu	0	H	28	75 μM	-	-	60
		Pb	0	H	28	100 μM	-	-	280
		Zn	0	H	28	750 μM	-	-	333
B. oleracea	Bronco	Zn	35	H	21	500 μM	42540.7	-	382.4	[64]
B. rapa	trilocularis line R-o-18	Zn	14	H	21	500 μM	32486	-	2994	[66]
a - ac. = acession number
b - age of the plant at the time of contamination, in days
c - H - Hydroponics, S - Soil (includes soil, peat, perlite and sand experiments)
d - days after treatment in days
e - Where a range of values is given, is the max and min of the studied varieties
f - results in italic where interpolated from graphic representations

## Sheet: Table S2
Table S2. Selected results on the changes in the activities of 5 enzymes (SOD, APX, CAT, GR, GPOD) involved in the anti-oxidative stress defense mechanisms in different Brassica species, as a function of experimental conditions and metal toxicity.
Enzyme	Species	Variety/Cultivara	Metal	Age (d)b	Mediumc	DAT (d)d	Concentration	Effecte				Ref.
								Roots		Leaves
SOD
	B. juncea	-	Cd	25	S	30,60,90	200 mg/L			­	­	[8]
							300 mg/L			­
		ac. 426308	Cd	14	H	15	10 μM			=	= =	[86]
							25 μM			=
							50 μM			=
		-	Cu	13	H	4	2 μM	=				[67]
							4 μM	­
							8 μM	­
							16 μM	­
		-	Cu	9	H		10 μM	­	= =			[21]
						7	25 μM	­
							50 μM	­
							10 μM	­	= =
						14	25 μM	­
							50 μM	­
	B. napus	Faisal canola	Cd	42	H	56	10 μM	­	¯	­	¯	[34]
							50 μM	­		­
		ZS758	Cd	7	H	15	100 μM			­	¯	[58]
							500 μM			¯
		Drakkar	Cd				10 μM			=	= ¯	[86]
				14	H	15	25 μM			=
							50 μM			¯
		ZS 758	Cr	14	S	15	100 μM	­	­	­	­	[23]
							400 μM	­		­
		Zheda 619	Cr	14	S	15	100 μM	­	­	­	­
							400 μM	­		­
		ZY 50	Cr	14	S	15	100 μM	­	­	­	­
							400 μM	­		­
		Zheda 622	Cr	14	S	15	100 μM	­	­	­	­
							400 μM	­		­
		-	Cu	9	H		10 μM	­	= =			[21]
						7	25 μM	=
							50 μM	=
							10 μM	­	= =
						14	25 μM	­
							50 μM	­
		Faisal canola	Pb	42	H	42	50 μM	­	¯	­	¯	[33]
							100 μM	­		­
	B. rapa	trilocularis line R-o-18	Zn	14	H	21	500 μM			­		[66]
APX
	B. juncea	ac. 426308	Cd	14	H	15	10 μM			=	¯ =	[86]
							25 μM			¯
							50 μM			¯
		-	Cd	25	S	30,60,90	200 mg/L			­	­	[8]
							300 mg/L			­
		-	Cd	29	H	10	3 mg/L	­	­	­	=	[14]
							9 mg/L	­		­
				15	S	90	5 mg/kg	­	­	­	=
							35 mg/kg	­		­
		-	Cd	0	S	90	5 mg/kg	=	= ­	=	­ ¯	[88]
							15 mg/kg	=		­
							35 mg/kg	­		­
		-	Cu	9	H		10 μM	=	¯ =			[21]
						7	25 μM	¯
							50 μM	¯
							10 μM	=	¯ =
						14	25 μM	¯
							50 μM	¯
		-	Cu	13	H	4	2 μM	­				[67]
							4 μM	­
							8 μM	­
							16 μM	=
	B. napus	Drakkar	Cd				10 μM			¯	= =	[86]
				14	H	15	25 μM			¯
							50 μM			¯
		Faisal canola	Cd	42	H	56	10 μM	­	¯	­	¯	[34]
							50 μM	­		­
		ZS758	Cd	7	H	15	100 μM			­	¯	[58]
							500 μM			¯
		ZS 758	Cr	14	S	15	100 μM	¯	¯	¯	¯	[23]
							400 μM	¯		¯
		Zheda 619	Cr	14	S	15	100 μM	=	¯	¯	¯
							400 μM	¯		¯
		ZY 50	Cr	14	S	15	100 μM	=	=	¯	¯
							400 μM	¯		¯
		Zheda 622	Cr	14	S	15	100 μM	=	¯	¯	¯
							400 μM	¯		¯
		-	Cu	9	H		10 μM	=	= =			[21]
						7	25 μM	¯
							50 μM	¯
							10 μM	­	= =
						14	25 μM	=
							50 μM	=
		Faisal canola	Pb	42	H	42	50 μM	­	¯	­	¯	[33]
							100 μM	­		­
	B. rapa	trilocularis line R-o-18	Zn	14	H	21	500 μM			­		[66]
CAT
	B. juncea	ac. 426308	Cd	14	H	15	10 μM			­	­ =	[86]
							25 μM			­
							50 μM			­
		-	Cd	25	S	30,60,90	200 mg/L			¯	¯	[8]
							300 mg/L			¯
		-	Cd	29	H	10	3 mg/L	­	­	=	­	[14]
							9 mg/L	­		­
				15	S	90	5 mg/kg	=	­	­	=
							35 mg/kg	­		­
		-	Cd	0	S	90	5 mg/kg	=	= =	­	­ ¯	[88]
							15 mg/kg	=		­
							35 mg/kg	­		­
		-	Cu	13	H	4	2 μM	=				[67]
							4 μM	¯
							8 μM	¯
							16 μM	¯
	B. napus	Drakkar	Cd				10 μM			¯	¯ =	[86]
				14	H	15	25 μM			¯
							50 μM			¯
		ZS758	Cd	7	H	15	100 μM			­	¯	[58]
							500 μM			¯
		ZS 758	Cr	14	S	15	100 μM	=	­	=	­	[23]
							400 μM	­		­
		Zheda 619	Cr	14	S	15	100 μM	=	=	=	­
							400 μM	­		­
		ZY 50	Cr	14	S	15	100 μM	=	=	=	=
							400 μM	=		­
		Zheda 622	Cr	14	S	15	100 μM	­	=	=	¯
							400 μM	­		=
		Faisal canola	Pb	42	H	42	50 μM	­	¯	­	¯	[33]
							100 μM	­		­
	B. rapa	trilocularis line R-o-18	Zn	14	H	21	500 μM			­		[66]
GR
	B. juncea	ac. 426308	Cd	14	H	15	10 μM			=	= =	[86]
							25 μM			=
							50 μM			=
		-	Cd	25	S	30,60,90	200 mg/L			­	­	[8]
							300 mg/L			­
	B. napus	Drakkar	Cd				10 μM			­	¯ =	[86]
				14	H	15	25 μM			¯
							50 μM			¯
		ZS758	Cd	7	H	15	100 μM			­	­	[58]
							500 μM			­
		Faisal canola	Cd	42	H	56	10 μM	­	¯	­	¯	[34]
							50 μM	­		­
GPOD
	B. juncea	ac. 426308	Cd	14	H	15	10 μM			=	¯ ¯	[86]
							25 μM			¯
							50 μM			¯
		-	Cd	29	H	10	3 mg/L	­	­	­	­	[14]
							9 mg/L	­		­
				15	S	90	5 mg/kg	­	­	­	=
							35 mg/kg	­		­
		-	Cd	0	S	90	5 mg/kg	­	= =	­	= =	[88]
							15 mg/kg	­		­
							35 mg/kg	­		­
		-	Cu	13	H	4	2 μM	=				[67]
							4 μM	­
							8 μM	­
							16 μM	­
	B. napus	Drakkar	Cd				10 μM			=	= =	[86]
				14	H	15	25 μM			­
							50 μM			­
		Faisal canola	Cd	42	H	56	10 μM	­	¯	­	¯	[34]
							50 μM	­		­
		ZS758	Cd	7	H	15	100 μM			­	¯	[58]
							500 μM			¯
		ZS 758	Cr	14	S	15	100 μM	=	­	=	­	[23]
							400 μM	­		­
		Zheda 619	Cr	14	S	15	100 μM	=	­	=	­
							400 μM	­		­
		ZY 50	Cr	14	S	15	100 μM	=	=	­	­
							400 μM	­		­
		Zheda 622	Cr	14	S	15	100 μM	=	=	=	=
							400 μM	=		=
		Faisal canola	Pb	42	H	42	50 μM	­	¯	­	¯	[33]
							100 μM	¯		¯
a - ac. = acession number
b - age of the plant at the time of contamination, in days
c - H - Hydroponics, S - Soil (includes soil, peat, perlite and sand experiments)
d - days after treatment in days
e - The symbols under the first column for leaves and roots, ­, ¯ and = indicate, respectively na increase, decrease or
no change in relation to the control. The symbols to the right of the curly brackets, ,indicate differences to the
previous treatment.
